# Designing and interpreting 4D tumour spheroid experiments

R. J. Murphy<sup>1</sup>, A. P. Browning<sup>1</sup>, G. Gunasingh<sup>2</sup>,  
N. K. Haass<sup>2,†</sup>, and M. J. Simpson<sup>1,†,\*</sup>

<sup>1</sup> *Mathematical Sciences, Queensland University of Technology, Brisbane, Australia*

<sup>2</sup> *The University of Queensland Diamantina Institute, The University of Queensland, Brisbane, Australia*

## Abstract

Tumour spheroid experiments are routinely used to study cancer progression and treatment. Various and inconsistent experimental designs are used, leading to challenges in interpretation and reproducibility. Using multiple experimental designs, live-dead cell staining, and real-time cell cycle imaging, we measure necrotic and proliferation-inhibited regions in over 1000 4D tumour spheroids (3D space plus cell cycle status). By intentionally varying the initial spheroid size and temporal sampling frequencies across multiple cell lines, we collect an abundance of measurements of internal spheroid structure. These data are difficult to compare and interpret. However, using an objective mathematical modelling framework and statistical identifiability analysis we quantitatively compare experimental designs and identify design choices that produce reliable biological insight. Measurements of internal spheroid structure provide the most insight, whereas varying initial spheroid size and temporal measurement frequency is less important. Our general framework applies to spheroids grown in different conditions and with different cell types.

---

\*Corresponding author: [matthew.simpson@qut.edu.au](mailto:matthew.simpson@qut.edu.au)

†These authors contributed equally.

# 1 Introduction

Tumour spheroid experiments are an important *in vitro* tool routinely used since the 1970s to understand avascular tumour growth, cancer progression, develop cancer treatments, and reduce animal experimentation [1–10]. However, a vast range of experimental designs are employed, leading to inconsistencies in: i) the times when measurements are taken; ii) experimental durations, ranging from a few days to over a month [11–16]; iii) the initial number of cells used to form spheroids [11–18], commonly between 300 to 20,000 cells [16,17]; and, iv) the type of experimental measurements that are taken [11–18]. This variability in experimental protocols makes comparing different studies very difficult, and introduces challenges in both interpretation and reproducibility of these experiments.

Mathematical modelling provides a powerful tool to provide such interpretation through model calibration and mechanism deduction. Simple mathematical models calibrated to outer radius measurements, such as Gompertzian growth models, have been used for decades to predict the growth of tumours [19,20]. However, these simple mathematical models do not provide information about the internal spheroid structure over time. In response, many mathematical models of varying complexity have been developed to explore the internal structure of spheroids [21–41]. Here, we revisit the seminal Greenspan mathematical model for avascular tumour spheroid growth and quantitatively directly connect it to data for the first time [21]. Greenspan’s mathematical model was the first to describe the three phases of avascular tumour spheroid growth: in phase (i) cells throughout the spheroid can proliferate; in phase (ii) cells near the periphery proliferate while a central region of living cells cannot proliferate, referred to as the inhibited region; and in phase (iii) there is an outer region of proliferative cells, an intermediate region of living inhibited cells, and a central necrotic region composed of dead cells and cellular material in various stages of disintegration and dissolution (Figure 1a-d, Methods 4.1). These various regions of cellular behaviour are thought to arise as a result of nutrient availability, such as oxygen, that is driven by diffusion and uptake.

In this study, we systematically explore a range of experimental designs and measurements. The first and simplest measurements we obtain are of the outer radius of the spheroid. Next, using live-dead cell staining we obtain measurements of the necrotic region. Measurements of the inhibited region are harder to obtain using traditional techniques. We use fluorescent ubiquitination-based cell cycle indicator (FUCCI) transduced cell lines [42–47]. The nuclei of these cells fluoresce red when cells are in the gap 1 (G1) phase of the cell cycle and green when cells are in the synthesis (S), gap 2 (G2) and mitotic (M) phases of the cell cycle (Figure 1e). For clarity, we choose to show cells in the gap 1 (G1) phase in magenta instead of red. These data are collected for human melanoma cell lines established from primary (WM793b) and metastatic cancer sites (WM983b, WM164) [43, 48–50], with endogenously low (WM793b) and high (WM983b, WM164) microphthalmia-associated transcription factor which is a master regulator of melanocyte biology [51]. Analysing these data provides real-time visualisation of the cell cycle throughout tumour spheroids and powerfully reveals the time evolution of the inhibited region (Figure 1a-d). This additional dimension of information

that we capture in our experiments, namely the cell cycle status, together with the three-spatial dimensions of the tumour spheroid give rise to the term 4D tumour spheroid experiments. Given an abundance of measurements of the outer radius, inhibited radius, and necrotic radius for tumour spheroids across multiple initial spheroid sizes, time points, and cell lines, we calculate maximum likelihood estimates (MLE) and form approximate 95% confidence intervals for the parameters of the Greenspan model. This allows us to quantitatively elucidate how modifying experimental designs can extract more information from experiments. Furthermore, this approach identifies the experimental design choices that are important and lead to reliable biological insight.

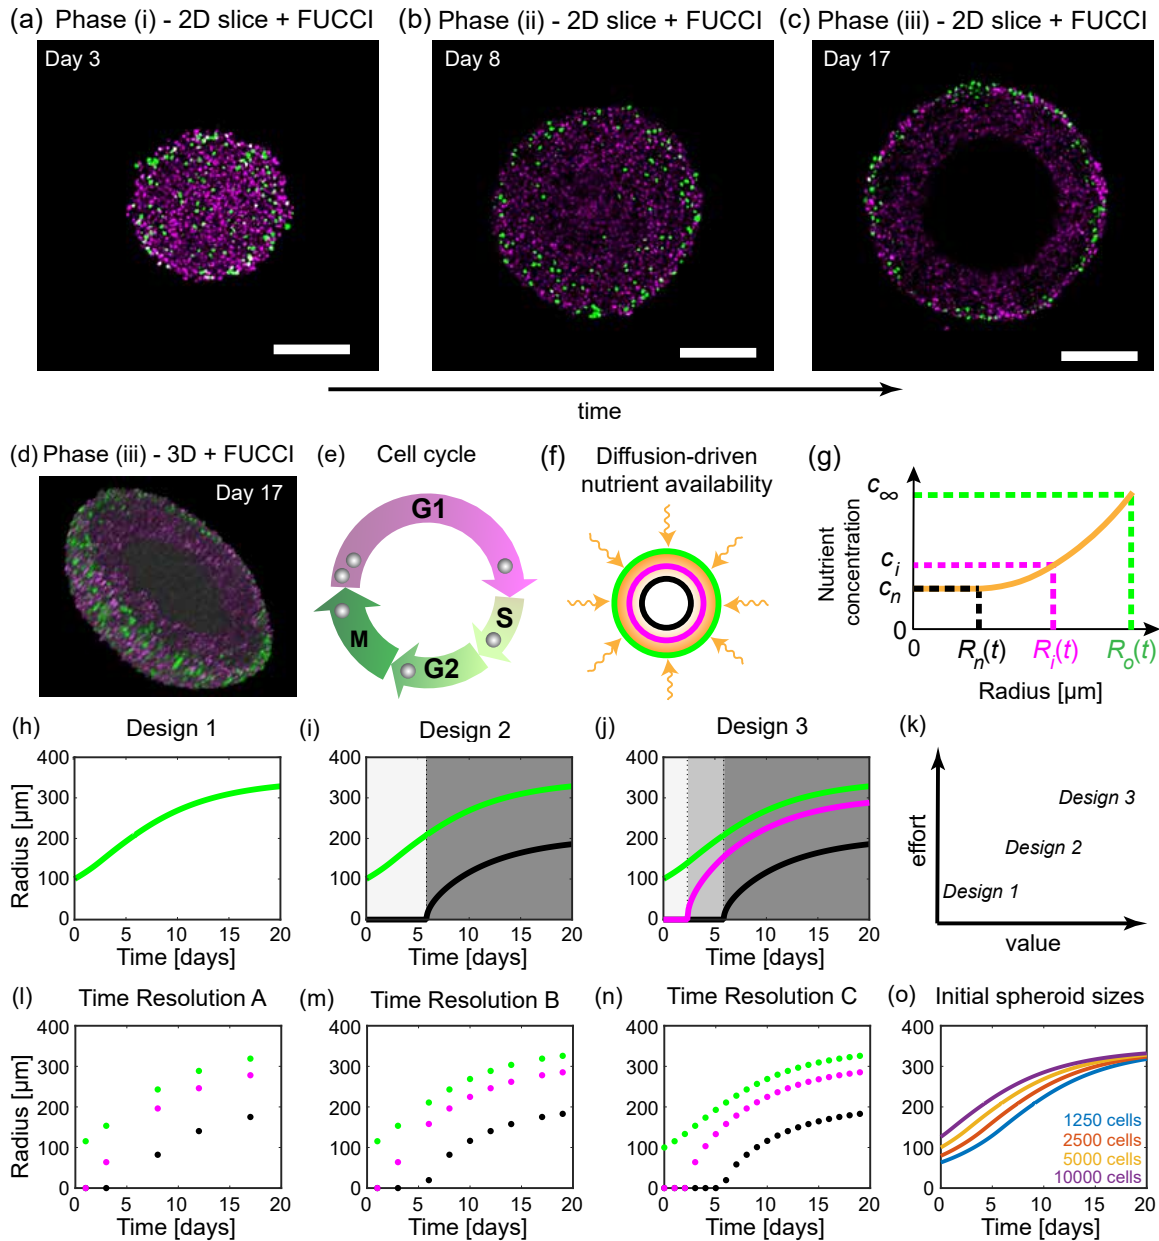

Figure 1: Tumour spheroid growth and the Greenspan mathematical model. Tumour spheroids experience three phases of growth. (a)-(d) Confocal microscopy reveals different phases of tumour growth. Fluorescent ubiquitination-based cell cycle indicator (FUCCI) transduced cells allow visualisation of each cell's stage in the cell cycle. (a)-(c) 2D equatorial plane images of WM793b human melanoma tumour spheroids, formed with 5000 cells per spheroid, on days 3, 8, and 17 after formation. Scale bar 200  $\mu\text{m}$ . (d) 3D representation of half of a WM793b human melanoma tumour spheroid on day 17 after formation, additional 3D representations are shown in supplementary material C.3.4. (e) Cell cycle schematic coloured with respect to FUCCI signal. (f) Schematic for Greenspan mathematical model. Nutrient diffuses within the tumour spheroid and is consumed by living cells. (g) Snapshot of nutrient concentration,  $c(r, t)$  for  $0 < r < R_o(t)$ , for a tumour spheroid in phase (iii) and where  $R_o(t)$  is the tumour spheroids outer radius. External nutrient concentration is  $c_\infty$ . Inhibited radius,  $R_i(t)$ , and necrotic radius,  $R_n(t)$ , are defined as the radius where the nutrient concentration first reaches the thresholds  $c_i$  and  $c_n$ , respectively. (h)-(j) Three experimental designs varying by measurement type. Design 1 considers only the outer radius (green). Design 2 considers the outer (green) and necrotic radius (black). Design 3 considers the outer (green), necrotic (black), and inhibited (magenta) radius. (k) Comparison of experimental designs with respect to their value and effort required. (l)-(n) Three experimental designs that vary due to the time resolution at which measurements are taken. (o) Four experimental designs that vary the number of cells used to form each spheroid.

## 2 Results

The results in this main document are for spheroids formed with the WM793b human melanoma cell line [43, 48–50]. Additional results in Supplementary Material F and G show results for two other cell lines.

### 2.1 Outer radius measurements are not sufficient to predict inhibited and necrotic radii

Tumour outer radius measurements are simple to obtain and have been used for decades to quantify tumour growth [19, 20]. Modern technology enables these measurements to be obtained more frequently, easily, and accurately. For example, the IncuCyte S3 live cell imaging system (Sartorius, Goettingen, Germany) enables automated image acquisition and processing to measure spheroids every minute throughout an experiment providing a large number of measurements with ease. However, it is unclear whether these measurements provide sufficient information to understand and probe the internal structure of tumour spheroids and accurately predict tumour growth. Furthermore, it is unclear when measurements should be taken and the frequency of measurement. Performing experiments with WM793b spheroids formed with 5000 cells per spheroid, a typical choice in many experiments [7, 11, 51, 52], 24 spheroids are imaged every six hours. We monitor the time evolution of the outer radius to determine when spheroid formation ends and growth begins, which we call day 0 and occurs four days after seeding (Supplementary Material C.1.1), and to decide when to terminate the experiment, which we choose to be day 20. These measurements, supplemented with additional outer radius measurements from spheroids harvested for confocal imaging (Supplementary Material C.2-C.3), provide an abundance of data. We now compare three experimental designs with increasing temporal resolution: (i) Resolution A, using measurements from days 1, 3, 8, 12, 17 (Figure 1l, 2a); (ii) Resolution B, using measurements from days 1, 3, 6, 8, 10, 12, 14, 17, 19 (Figure 1m, 2b); and, (iii) Resolution C, using daily measurements from day 0 to day 19 (Figure 1n, 2c). Excluding the final day(s) of measurements from these temporal resolutions allows a predictive check to be performed. Note that all these temporal resolutions are low relative to the capability of the automated imaging system but are high relative to the number of measurements typically taken in standard experiments [11, 12, 14, 43, 53].

To understand the influence of the choice of temporal resolution we now qualitatively and quantitatively compare the results. Across the three temporal resolutions in Figures 2d-f we observe excellent agreement between the full set of outer radius measurements, collected every six hours, and the predicted outer radius from the Greenspan model simulated with the MLE (Methods 4.1-4.2). However, it is clear that the prediction of the inhibited and necrotic radius is poor with Resolutions A and B (Figures 2d-e). With Resolution C, the prediction of the inhibited and necrotic radius appears to have improved (Figure 2f) but we will show that it is misleading to suggest that increasing the temporal resolution is always beneficial. While MLE point estimates are insightful, it

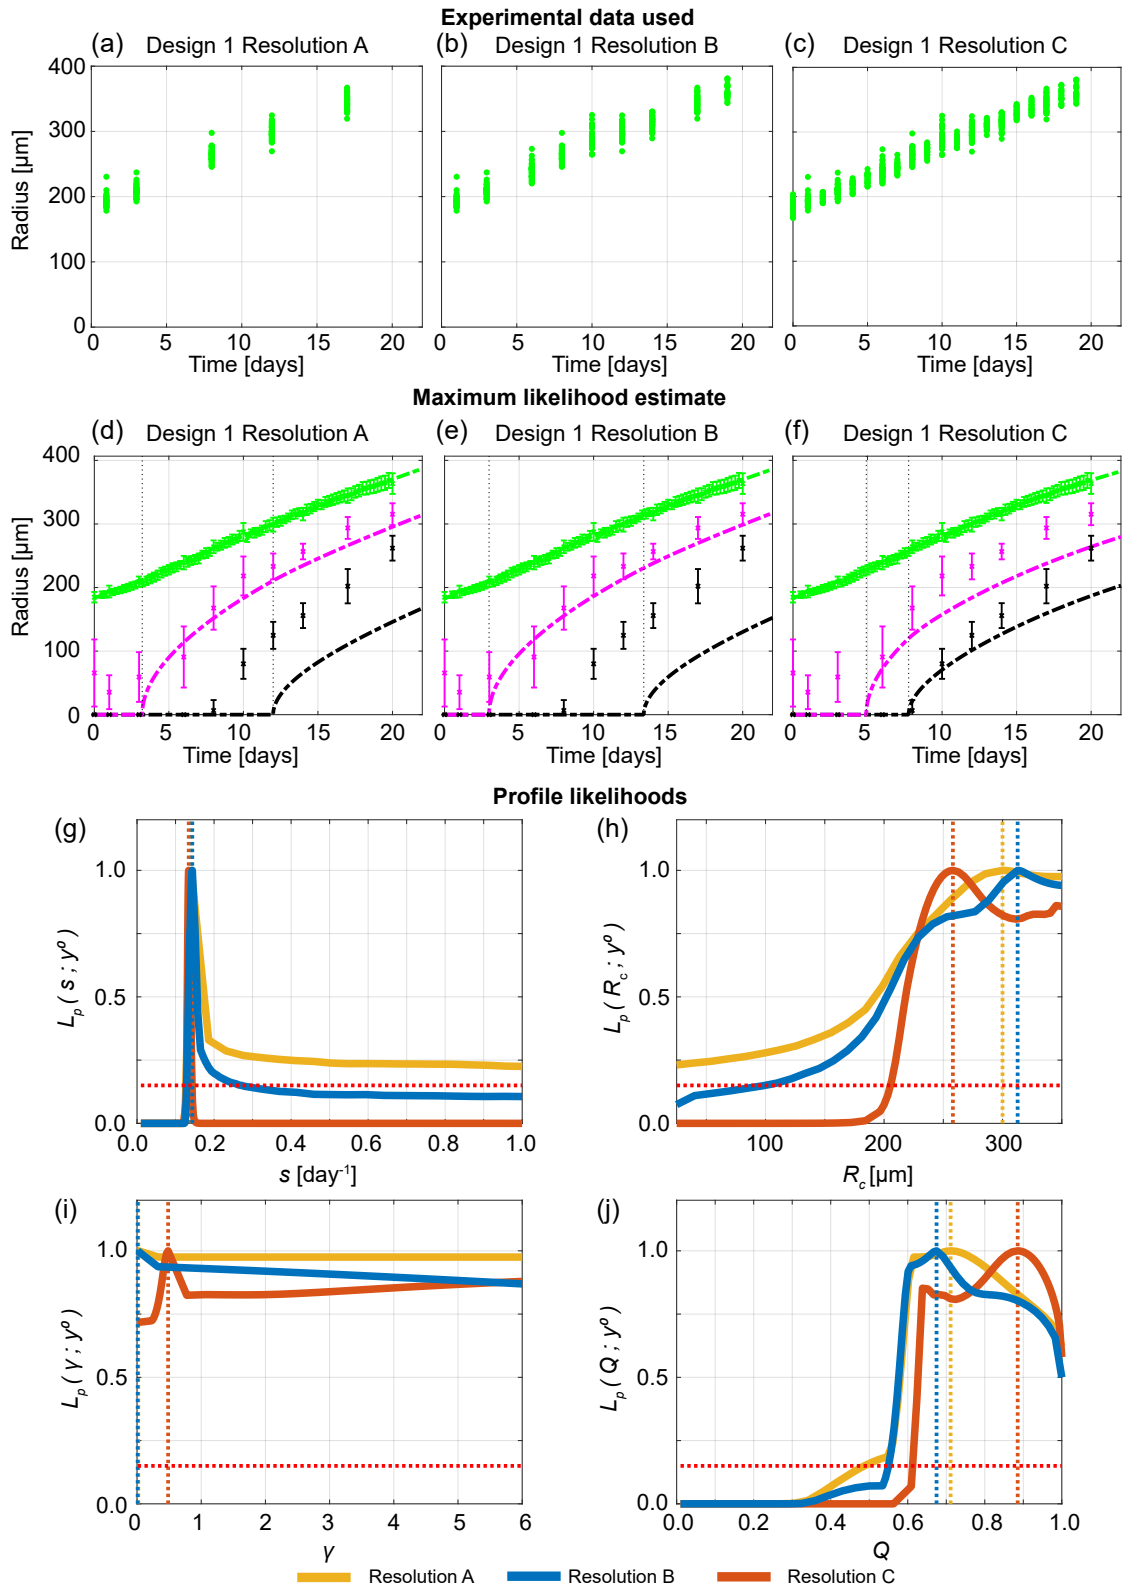

Figure 2: Increasing the temporal resolution when the outer radius is measured is not sufficient to predict necrotic and inhibited radii. (a)-(c) Experimental data used in Design 1 with temporal resolutions A, B, and C. (d)-(f) Comparison of Greenspan model simulated with maximum likelihood estimate compared to full experimental data set, where error bars show standard deviation of the experimental data. Profile likelihoods for (g)  $s$ , (h)  $R_c$ , (i)  $\gamma$ , (j)  $Q$ . Yellow, blue, orange lines in (g)-(j) represent profile likelihoods from Design 1 with temporal resolutions A, B, and C, respectively, and the red-dashed line shows the approximate 95% confidence interval threshold. Results shown for WM793b spheroids formed with 5000 cells per spheroid.

is unclear whether a similarly excellent match to the outer radius measurements could be obtained with different parameter values in the mathematical model. To answer this question we undertake a profile likelihood analysis of the five parameters that govern the behaviour of the mathematical model (Methods 4.1):

1.  $s$  [ $\text{day}^{-1}$ ], the rate at which cell volume is produced by mitosis per unit volume of living cells (Figure 2g),
2.  $R_c$  [ $\mu\text{m}$ ], the outer radius when the necrotic region first forms (Figure 2h),
3.  $\gamma = \lambda/s$  [-], the proportionality constant given by the rate at which cell volume is lost from the necrotic core,  $\lambda$ , divided by the rate at which cell volume is produced by mitosis per unit volume of living cells,  $s$ , (Figure 2i),
4.  $Q^2 = (c_\infty - c_i) / (c_\infty - c_n)$  [-], the ratio of the difference between the inhibited nutrient concentration threshold,  $c_i$ , and external nutrient threshold,  $c_\infty$  to the difference between the necrotic nutrient concentration threshold,  $c_n$ , and external nutrient threshold,  $c_\infty$  (Figure 2j),
5.  $R_o(0)$  [ $\mu\text{m}$ ], the initial outer radius (Supplementary Material D.3).

Profile likelihoods are a powerful tool to visualise and analyse how many parameter values give a similar match to the experimental data in comparison to the MLE. Furthermore, we use profile likelihoods to compute approximate 95% confidence intervals for each parameter (Supplementary Material D.1). Narrow approximate 95% confidence intervals indicate parameters are identifiable and that few parameters give a similar match to the data as the MLE. In contrast, wide approximate 95% confidence intervals suggest that parameters are not identifiable, that many parameters give a similar match to the experimental data, and that additional information is required to confidently estimate the parameters.

The profile likelihoods for  $s$  across all three temporal resolutions (Figure 2g) lead to a peak that is close to  $s = 0.14$  [ $\text{day}^{-1}$ ]. These peaks correspond to the MLEs. While there is a wide 95% approximate confidence interval for  $s$  with Resolution A, there are narrow approximate 95% confidence intervals for  $s$  with Resolutions B and C. The profile likelihoods for the other parameters,  $R_c$ ,  $\gamma$ , and  $Q$ , are wide and do not change significantly using different temporal resolutions (Figures 2h-j). For example, the profile likelihoods for  $\gamma$  across all three temporal resolutions (Figure 2i) are approximately flat and equal to one. These profile likelihoods for  $R_c$ ,  $\gamma$ , and  $Q$  suggest that increasing the temporal resolution does not provide significant additional information. These results are consistent with additional results using synthetic data (Supplementary Material E). Additional results for different initial spheroid sizes (Supplementary Material D) and results for the WM983b cell line also clearly show that increasing the temporal resolution may result in a worse prediction from the MLE for the time evolution of the internal structure (Supplementary Material F). Overall, these results suggest that Design 1 (Figure 1h) is not a reliable design to identify the true parameter

values and cannot be used to determine details of the internal structure of tumour spheroids. This is important because this is the most standard measurement [5, 14–16, 19, 53].



## 2.2 Cell cycle data are informative

Given that measuring the outer radius of tumour spheroids alone (Design 1) is insufficient to determine details of the internal spheroid structure, we now examine which measurements are required to provide reliable estimates. The next simplest measurements to obtain are both the outer radius and necrotic core radius, which we refer to as Design 2 (Figure 1i). However, Design 2 requires far more experimental effort since necrotic core measurements are more time-consuming involving harvesting, fixing, staining procedures, confocal microscopy or cryosectioning, and image processing. In addition, necrotic core measurements are end point measurements only, meaning that many spheroids are required to collect many data points. While intuitively we may anticipate that more effort leads to more insight, it is impossible to quantify the value of this additional effort without a mathematical modelling and uncertainty quantification framework such that we employ here.

Using Design 2, with low temporal resolution, for spheroids formed with 5000 cells per spheroid, we do not observe a necrotic core until approximately day 8 (Figure 3a, Supplementary Material C.3.1). The Greenspan model simulated with the MLE excellently matches the growth of the outer radius, as before, and now captures the formation and growth of the necrotic core (Figure 3c). Interestingly, the MLE suggests that the inhibited region is very small, so  $R_i(t)$  is very close to  $R_n(t)$ . However, experimental measurements of the inhibited radius not only suggest that an inhibited region exists, but that it forms prior to the formation of the necrotic core (Supplementary Material C.3.1). Profile likelihoods for each parameter are relatively narrow, and because the profile for  $Q$  is peaked and close to  $Q = 1$ , these profiles are consistent with either the absence of an inhibited region or a very small inhibited region (Figures 3e-h). Therefore, these data do not identify the true parameter values since the calibrated mathematical model is inconsistent with the experimental observations that clearly show the formation of an inhibited region. This inconsistency does not mean that the mathematical model is incorrect. Our interpretation of this inconsistency is that this experimental data are insufficient to identify the parameters in the mathematical model.

We now explore Design 3, where we measure the outer, necrotic, and inhibited radius of multiple tumour spheroids (Figure 1j, 3b). This design is considered third because measuring the inhibited radius is more difficult and requires substantial additional experimental effort. Using FUCCI transduced cell lines in combination with optical clearing procedures and confocal microscopy powerfully reveals intratumoral spatiotemporal differences with respect to the cycle. This method also requires semi-automated image processing and expert guidance to minimise subjectivity and accurately identify the inhibited region boundary (Supplementary Material C.2) [52]. Simulating the Greenspan model with the MLE from Design 3 matches the evolution of the outer radius and captures the evolution of the necrotic and inhibited regions very accurately (Figure 3d). Furthermore, the profile likelihoods for all parameters are well formed, with a single narrow peak, suggesting that Design 3 identifies the true parameter values (Figure 3e-h). Comparing experimental Designs 1, 2, and 3, we observe that the profile likelihoods for  $s$  are consistent across all designs (Figure 3e) and the profile

likelihoods for  $R_c$  (Figure 3f) are consistent for Designs 2 and 3. However, the profile likelihoods for  $\gamma$  (Figure 3g) and  $Q$  (Figure 3h) emphasise the power of measuring the inhibited radius and using Design 3 in comparison to Designs 1 and 2. These observations are consistent with additional results obtained using synthetic data (Supplementary Material E), different cell lines (Supplementary Material F), and initial spheroid sizes (Supplementary Material D.5). In Supplementary Material D.2, we also consider Design 3 with different temporal resolutions and experimental durations. Experiments performed for 4 or 10 days after spheroids form do not accurately predict late time behaviour. Designs that use the first days 10 to 20 or days 16 to 19 of measurements do not always accurately predict early time behaviour. Most insight is gained with Resolutions A, B, and C that cover the full experimental duration.

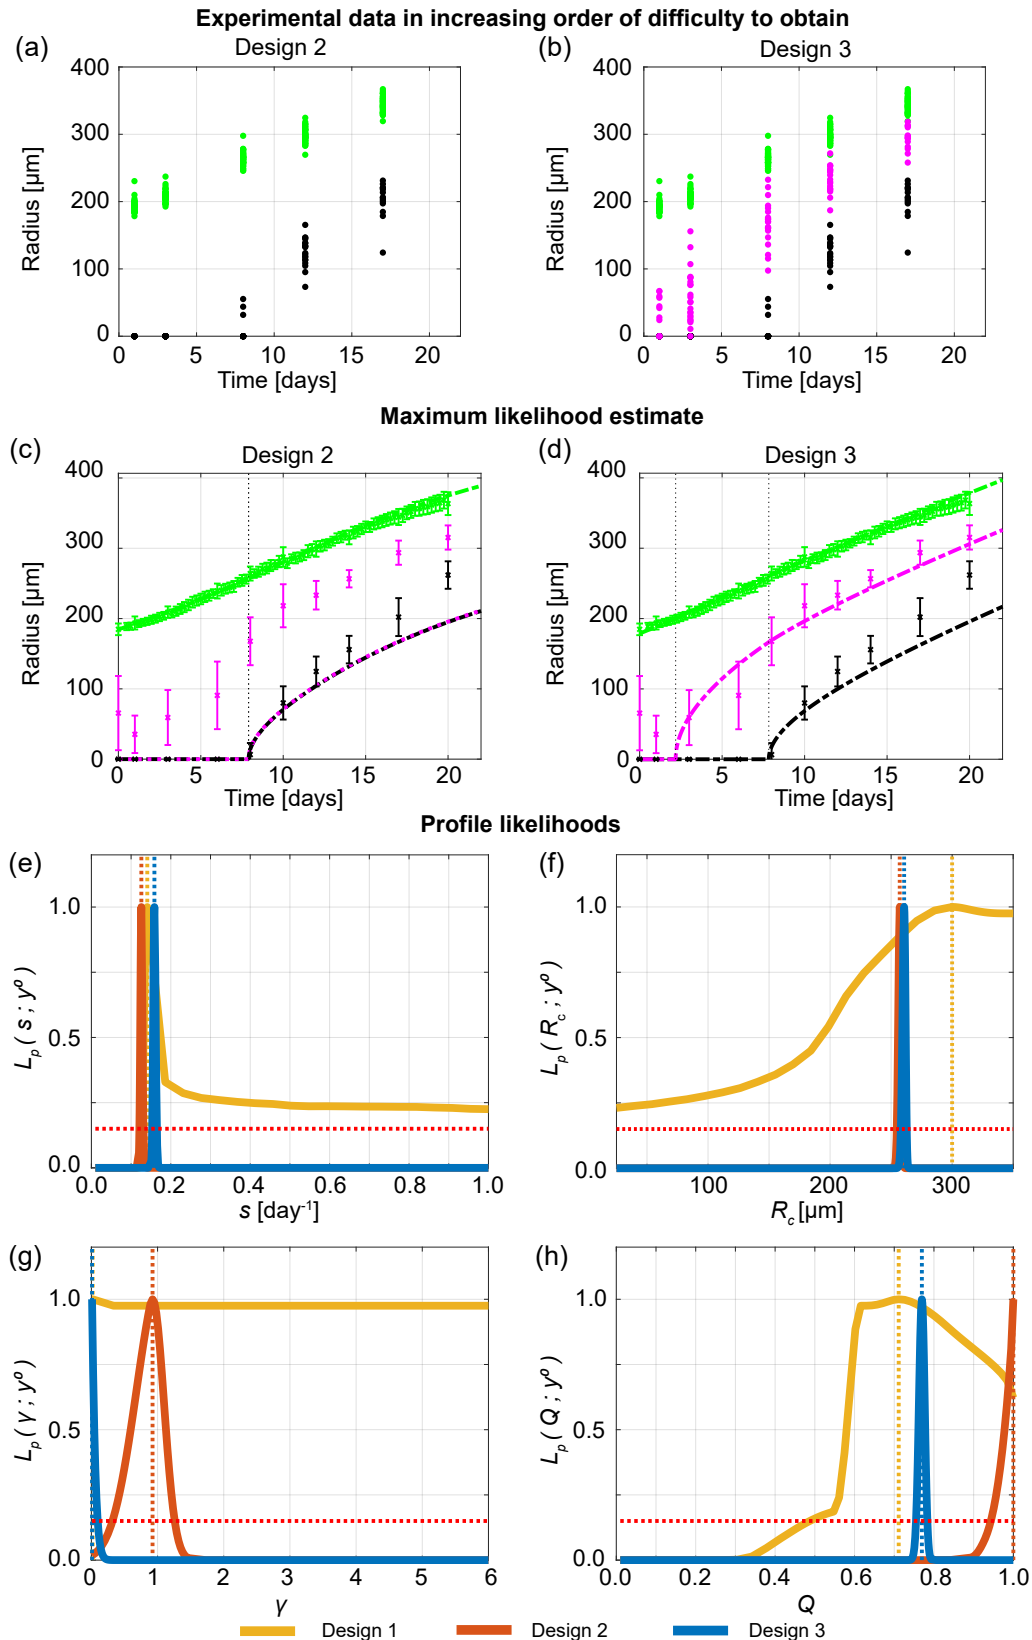

Figure 3: Measuring the necrotic and inhibited radius provides valuable information. (a)-(b) Experimental data used in Designs 2 and 3. (c)-(d) Comparison of Greenspan model simulated with maximum likelihood estimate compared to full experimental data set for Designs 2 and 3, where error bars show standard deviation. Profile likelihoods for (e)  $s$ , (f)  $R_c$ , (g)  $\gamma$ , (h)  $Q$ . Yellow, orange, blue lines in (e)-(h) represent profile likelihoods from Designs 1, 2, and 3, respectively, and the red-dashed line shows the approximate 95% confidence interval threshold. Results shown for WM793b spheroids formed with 5000 cells per spheroid.

### 2.3 Information gained using spheroids of different sizes is consistent

In the literature tumour spheroids are initialised with a wide range of cell numbers, leading to inconsistent results that are difficult to meaningfully compare across different protocols [11–18]. Furthermore, it is unclear what the impact of this variability is when tumour spheroids are used to study fine-grained molecular-level interventions or potential drug designs. To quantitatively compare how information gained across experimental designs differs with respect to the initial number of cells in a spheroid we consider four initial spheroid sizes: 1250, 2500, 5000, 10000 cells per spheroid (Figure 1o). To proceed we use Design 3, and measure outer, necrotic, and inhibited radius, with time resolution A. Profile likelihoods for  $R_o(0)$  show four distinct narrow peaks corresponding to each initial spheroid size as expected (Figure 4a). Profile likelihoods for  $s$ ,  $R_c$ , and  $Q$  are consistent across the four initial spheroid sizes, allowing us to compare profile likelihoods on narrower intervals in Figures 4b,c,e. The profile likelihoods for  $\gamma$  (Figures 4d) are more variable due to the differing number of measurements collected in phase (iii). These results suggest that the initial spheroid size does not play a significant role in determining information from experiments, provided sufficient measurements are obtained in phase (iii). To support these results, we show along the diagonal of Figure 4f the solution of the mathematical model evaluated at the MLE associated with each initial spheroid size compared to the experimental measurements. Next, on the off-diagonals of Figure 4f, we compare how the Greenspan model simulated with the MLE from one initial spheroid size predicts data from different initial spheroid sizes by only changing the initial radius. For example, in the top right of Figure 4f we show that the Greenspan model simulated with the MLE obtained formed with 10000 cells per spheroid agrees well with data from spheroids formed with 1250 cells per spheroid, when the initial radius is set to be the initial radius of the 1250 MLE. Results in Figure 4f also show the inhibited and necrotic regions form earlier when considering spheroids formed with more cells, and spheroids formed with 10000 cells per spheroid suggests that spheroids form in phase (ii) rather than phase (i). These observations are consistent with additional results from synthetic data (Supplementary Material E) and the WM983b cell line (Supplementary Material F).

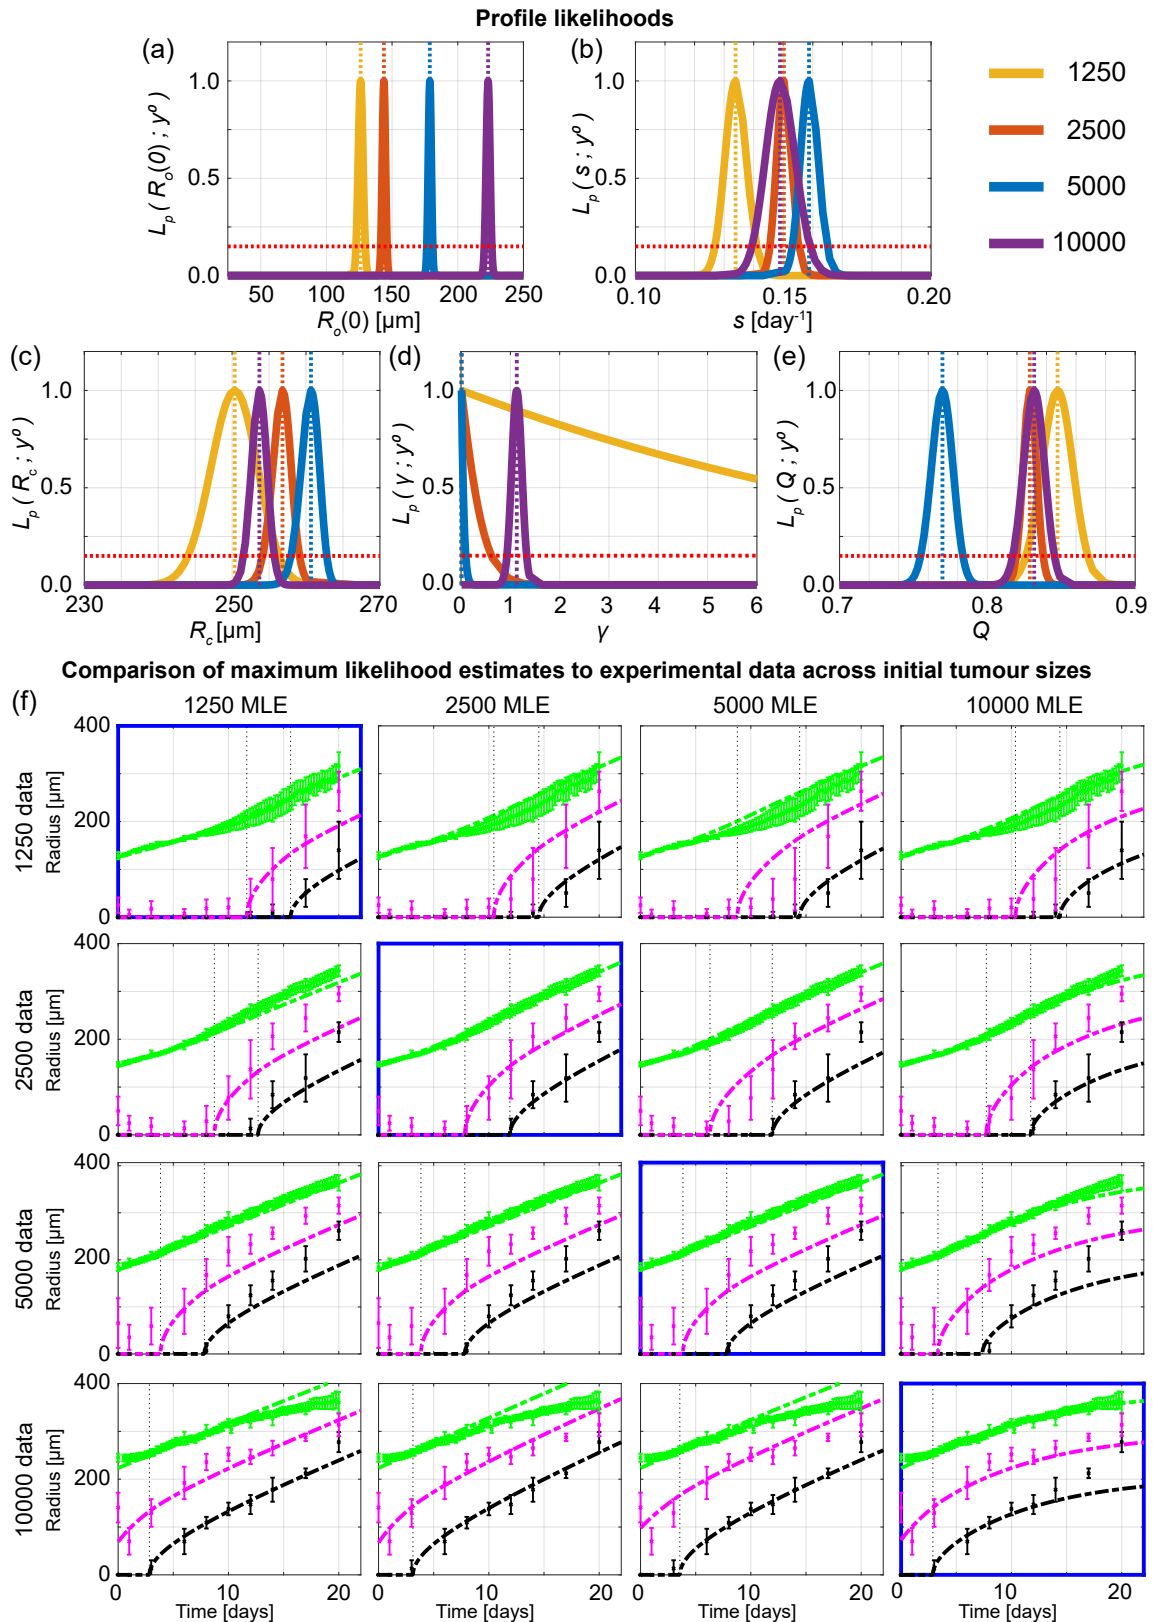

Figure 4: Information gained from experiments across different initial tumour spheroid sizes is mostly consistent. Profile likelihoods for (a)  $R_o(0)$ , (b)  $s$ , (c)  $R_c$ , (d)  $\gamma$ , (e)  $Q$ . Yellow, orange, blue, and purple lines in (a)-(e) represent profile likelihoods from WM793b spheroids formed with 1250, 2500, 5000, 10000 cells per spheroid, respectively, and the red-dashed line shows the approximate 95% confidence interval threshold. (f) Comparison of Greenspan model simulated with maximum likelihood estimates compared to full experimental data sets across initial tumour spheroid size, where error bars show standard deviation.

### 3 Discussion

In this work we present an objective theoretical framework to quantitatively compare tumour spheroid experiments across a range of experimental designs using the seminal Greenspan mathematical model and statistical profile likelihood analysis. By considering different temporal data resolutions, experiment durations, types of measurements, and initial spheroid sizes we identify the experimental design choices that lead to reliable biological insight. Namely, Design 3 where we obtain outer, necrotic, and inhibited radius measurements requires most effort but is essential to determine the dynamics of tumour spheroid structure and growth. Importantly, we also show that temporal resolution and initial spheroid sizes are less important choices. Therefore, we recommend that for future studies, where tumour spheroid structure is important, that cell cycle data are essential and that some measurements using Design 3 is more valuable than many measurements using Designs 1 or 2. Furthermore, as information from tumour spheroids across varying initial spheroid sizes is relatively consistent, provided sufficient measurements in phase (iii) are obtained, we recommend that performing experiments with larger tumour spheroids can be beneficial to obtain useful information in a shorter experimental duration (Supplementary Material E.3). However, we also note that this may lead to large tumour spheroids that begin growth in phase (ii) rather than phase (i).

To perform this analysis we use Greenspan's seminal mathematical model, where all parameters have a relatively straightforward biological interpretation. We find that Greenspan's model performs remarkably well across cell lines and initial spheroid sizes, and provides powerful insights into experimental design. Even though Greenspan's model is relatively simple, and may not capture all of the biological details of tumour spheroid growth, the fact that results for experimental data are consistent with those from synthetic data enhances our confidence that key biological features are captured in Greenspan's model (Supplementary Material E). Future modelling may wish to explore potential model misspecifications, for example WM983b spheroids appear to reduce in size at very late time suggesting a fourth phase in these *in vitro* experiments (Supplementary Material F); and, WM164 spheroids, possibly due to their lack of spherical symmetry [51], are more challenging to interpret as information gained using spheroids of different sizes is not consistent (Supplementary Material G).

The general framework presented in this work can be applied to other cell types, for example Fucci-transduced lung, stomach and breast cancer cells [47, 54–56], to extract more information from existing experimental data across experimental designs, and is suitable to be extended to consider tumour spheroids grown in different conditions and to more complex mathematical models. Given that cell cycle data is demonstrated to be informative in this study, we suggest that it may be beneficial for Fucci technology to be further developed and more widely used, for example in avascular patient-derived organoids [57], and our framework be extended to these heterogeneous populations accordingly. Furthermore, the insights of this study provide a platform for future studies that develop, test, and examine cancer treatments with spheroids. In such future studies cell cycle

data will be informative since cytotoxic or cytostatic drugs may result in similar changes in the outer radius but due to different causes, that can be measured by cell death and cell cycle imaging (Haass laboratory unpublished observations).

## 4 Methods

### 4.1 Mathematical model

Greenspan's mathematical model describes the three phases of avascular tumour spheroid growth [21]. Spherical symmetry is assumed at all times and maintained by adhesion and surface tension. Under these minimal assumptions, the only independent variables are time,  $t$  [days], and radial position,  $r$  [ $\mu\text{m}$ ]. Tumour growth is governed by the evolution of the outer radius,  $R_o(t)$  [ $\mu\text{m}$ ], the inhibited radius,  $R_i(t)$  [ $\mu\text{m}$ ], and the necrotic radius,  $R_n(t)$  [ $\mu\text{m}$ ]. Nutrient diffuses within the spheroid with diffusivity  $k$  [ $\mu\text{m}^2 \text{day}^{-1}$ ] and is consumed by living cells at a constant rate per unit volume  $\alpha$  [ $\text{mol } \mu\text{m}^{-3} \text{day}^{-1}$ ]. The external nutrient concentration is  $c_\infty$  [ $\text{mol } \mu\text{m}^{-3}$ ]. The nutrient concentration at a distance  $r$  from the centre of the spheroid and time  $t$ , denoted  $c(r, t)$  [ $\text{mol } \mu\text{m}^{-3}$ ], is assumed to be at diffusive equilibrium. Therefore, at any instant in time we have  $c(r, t) = c(r)$  due to fast diffusion of nutrient. However, as  $R_o(t)$  is growing, nutrient diffusion occurs on a growing domain and we write  $c(r) = c(r(t))$ . The inhibited and necrotic regions form when the nutrient concentration at the centre of the spheroid reaches  $c_i$  [ $\text{mol } \mu\text{m}^{-3}$ ] and  $c_n$  [ $\text{mol } \mu\text{m}^{-3}$ ], respectively. For  $c(r(t)) > c_n$  the rate at which cell volume is produced by mitosis per unit volume of living cells is  $s$  [ $\text{day}^{-1}$ ]. In the necrotic core cellular debris disintegrates into simpler chemical compounds that are freely permeable through cell membranes. The mass lost in the necrotic region is replaced by cells pushed inwards by forces of adhesion and surface tension. The necrotic core loses cell volume at a rate proportional to the necrotic core volume with proportionality constant  $3\lambda$  [ $\text{day}^{-1}$ ], where the three is included for mathematical convenience.

Conservation of mass is written in words as  $A = B + C - D - E$  where  $A$  is the total volume of living cells at any time,  $t$ ;  $B$  is the initial volume of living cells at time  $t = 0$ ;  $C$  is the total volume of cells produced in  $t \geq 0$ ;  $D$  is the total volume of necrotic debris at time  $t$ ;  $E$  is the total volume lost in the necrotic core in  $t \geq 0$ . Writing  $A, B, C, D, E$  in their mathematical form gives the conservation of mass equation and also writing the nutrient diffusion equation gives,

$$R_o^2(t) \frac{dR_o(t)}{dt} = \frac{s}{3} [R_o^3(t) - R_i^3(t)] - \lambda R_n^3(t), \quad (1.1)$$

$$\frac{1}{r^2} \frac{\partial}{\partial r} \left( r^2 \frac{\partial}{\partial r} c(r(t)) \right) = \frac{\alpha}{k} \text{H}(r - R_n(t)) \text{H}(R_o(t) - r), \quad 0 \leq r \leq R_o(t) \quad (1.2)$$

where  $R_i(t), R_n(t)$  are the radii implicitly defined by  $c(R_i(t), t) = c_i$ , and  $c(R_n(t), t) = c_n$ , respectively, if the nutrient concentration inside the spheroid is sufficiently small otherwise  $R_i(t) = 0$  or  $R_n(t) = 0$ , and  $\text{H}(\cdot)$  is the Heaviside step function. There are eight unknowns:  $\Theta = (s, \lambda, \alpha, k, c_\infty, c_i, c_n, R_o(0))$ . Note this includes  $R_o(0)$  which we treat as a parameter since we also need to estimate this quantity. Rescaling reduces the number of parameters to five:  $\theta = (R_o(0), R_c, s, \gamma, Q)$ . The new dimensionless parameters are: the outer radius when the necrotic region first forms defined as  $R_c^2 = (6k/\alpha)(c_\infty - c_n)$ ;  $Q^2 = (c_\infty - c_i)/(c_\infty - c_n)$ ; and  $\gamma = s/\lambda$ . Further details, and a formal demonstration that this model is equivalent to a model where nutrient determines the necrotic region and waste produced from live



cells determines the inhibited region, are provided in Supplementary Material A.

## 4.2 Practical parameter identifiability analysis

To determine the maximum likelihood estimate (MLE) and approximate 95% confidence intervals for the parameters  $\theta = (R_o(0), R_c, s, \gamma, Q)$  we use profile likelihood identifiability analysis [58–62]. We first choose simple parameter bounds and then compare the width of these simple parameter bounds to realised interval estimates for the parameters. Initial parameter bounds are chosen to be the same across all experimental designs analysed in this study. Outer radius data suggests we choose  $0 < R_o(0) < 350$  [ $\mu\text{m}$ ] and  $0 < R_c < 250$  [ $\mu\text{m}$ ]. Assuming a cell doubling time of at least 12 hours and performing preliminary data exploration, we set  $0 < s < 1$  [ $\text{day}^{-1}$ ] (Supplementary Material B.1). Limited information exists for the parameter  $\gamma$  so bounds are determined by preliminary data exploration to be  $0 < \gamma < 6$ . By definition of  $Q$  and experimental results that show the inhibited region forms before the necrotic core, we set  $0 < Q \leq 1$ . Note that the time-evolution of  $R_o(t)$  and  $R_n(t)$  are the same for  $Q = 1$  and  $Q > 1$ . The difference arises for  $R_i(t)$ , where it is equal to  $R_n$  for  $Q = 1$  and equal to zero for  $Q > 1$ .

To determine the interval estimates for the parameters we treat the mathematical model as having two components. The first is the deterministic mathematical model governing the evolution of  $R_o(t)$ ,  $R_n(t)$ , and  $R_i(t)$  and the second is a probabilistic observation model accounting for experimental variability and measurement error. Specifically, we assume that experimental measurements are noisy observations of the deterministic mathematical model [62, 63]. For each of the three measurement types  $R_o(t)$ ,  $R_n(t)$ , and  $R_i(t)$  we assume that the observation error is independent and identically distributed and that the noise is additive and normally distributed with zero mean and variance  $\sigma_o^2$ ,  $\sigma_n^2$ , and  $\sigma_i^2$ , respectively [63, 64] (Supplementary Material B.3). We approximate  $\sigma_o^2 \approx s_o^2$ ,  $\sigma_n^2 \approx s_n^2$ , and  $\sigma_i^2 \approx s_i^2$  where  $s_o^2$ ,  $s_n^2$ , and  $s_i^2$  are pooled sample variances of the outer, necrotic, and inhibited radius measurements, respectively [65].

The likelihood function  $p(y^o|\theta)$  is the likelihood of the observations  $y^o$  given the parameter  $\theta$ . This corresponds to the probabilistic observation model evaluated at the observed data. The maximum likelihood estimate is  $\hat{\theta} = \underset{\theta}{\operatorname{argmax}} p(y^o|\theta)$ . We present results in terms of the normalised likelihood function  $L(\theta; y^o) = p(y^o|\theta) / \max_{\theta} p(y^o|\theta)$  which we consider a function of  $\theta$  for fixed  $y^o$ . Profile likelihoods for each parameter are obtained by assuming the full parameter  $\theta$  can be partitioned into a scalar interest parameter,  $\psi$ , and vector nuisance parameter,  $\phi$ , so that  $\theta = (\psi, \phi)$ . The profile likelihood for  $\psi$  is then  $L_p(\psi; y^o) = \max_{\phi} L(\psi, \phi; y^o)$ . Approximate 95% confidence intervals are then calculated using a profile likelihood threshold value of 0.15 (Supplementary Material D.1) [60]. Prediction intervals are not shown since confidence intervals are narrow in many cases. Further details, including exact forms of the likelihood function and the use of log-likelihoods for calculations, and numerical methods are provided in Supplementary Material B.

### 4.3 Experimental methods

*Cell culture.* The human melanoma cell lines WM793b, WM983b, and WM164 were genotypically characterised [43, 48–50], grown as described in [7], and authenticated by short tandem repeat fingerprinting (QIMR Berghofer Medical Research Institute, Herston, Australia). All cell lines were transduced with fluorescent ubiquitination-based cell cycle indicator (FUCCI) constructs as described in [7, 43].

*Spheroid generation, culture, and experiments.* Spheroids were generated in 96-well cell culture flat-bottomed plates (3599, Corning), with four different seeding densities (1250, 2500, 5000, 10000 total cells/well), using 50  $\mu$ L total/well non-adherent 1.5% agarose to promote formation of a single spheroid per well [52]. For all spheroid experiments, after a formation phase of 4, 3 and 2 days for WM793b, WM164 and WM983b, respectively (Supplementary Material C.1.1), and then every 3-4 days for the duration of the experiment, 50% of the medium in each well was replaced with fresh medium (200  $\mu$ L total/well). Incubation and culture conditions were as described in *Cell culture*.

To estimate the outer radius, one plate for each cell line, containing 24 spheroids for each initial spheroid size, was placed inside the IncuCyte S3 live cell imaging system (Sartorius, Goettingen, Germany) incubator (37 °C, 5% CO<sub>2</sub>) immediately after seeding the plates. IncuCyte S3 settings were chosen to image every 6 hours for the duration of the experiment with the 4 $\times$  objective. To estimate the radius of the inhibited and necrotic region and additional outer radius measurements, spheroids maintained in the incubator were harvested, fixed with 4% paraformaldehyde (PFA), and stored in phosphate buffered saline solution, sodium azide (0.02%), Tween-20 (0.1%), and DAPI (1:2500) at 4 °C, on days 3, 4, 5, 7, 10, 12, 14, 16, 18, 21 and 24 after seeding. For necrotic core measurements, 12 hours prior to harvesting 1  $\mu$ mol total/well DRAQ7<sup>TM</sup> dye (Abcam, Cambridge, United Kingdom. ab109202) was added to each well [52, 66]. Fixed spheroids were set in place using low melting 2% agarose and optically cleared in 500  $\mu$ L total/well high refractive index mounting solution (Quadrol 9 % wt/wt, Urea 22 % wt/wt, Sucrose 44 % wt/wt, Triton X-100 0.1 % wt/wt, water) for 2 days in a 24-well glass bottom plate (Cellvis, P24-1.5H-N) before imaging to ensure accurate measurements [67, 68]. Images were then captured using an Olympus FV3000 confocal microscope with the 10 $\times$  objective focused on the equatorial plane of each spheroid.

*Image processing.* Images captured with the IncuCyte S3 were processed using the accompanying IncuCyte 2020C Rev1 software (spheroid analysis type, red image channel, largest red object area per well). Area masks were visually compared with IncuCyte brightfield images to confirm accuracy. Area was converted to an equivalent radius ( $r^2 = A/\pi$ ). Confocal microscopy images were converted to TIFF files in ImageJ and then processed with custom MATLAB scripts that use standard MATLAB image processing toolbox functions. These scripts are freely available on Zenodo with DOI:10.5281/zenodo.5121093 [69].

## **Data Access**

Experimental data is available in the electronic supplementary material. Key code used to generate computational results are available on a GitHub repository.

## **Author Contributions**

All authors conceived and designed the study. R.J.M. performed the research and drafted the article. R.J.M., A.P.B., and G.G. performed experimental work. All authors provided comments and approved the final version of the manuscript. N.K.H. and M.J.S. contributed equally.

## **Competing Interests**

We have no competing interests.

## **Funding**

M.J.S. and N.K.H. are supported by the Australian Research Council (DP200100177).

## **Acknowledgements**

We thank Dr Pascal Buenzli and Dr Patrick Thomas for helpful discussions, John Blake for guidance using IncuCyte, and Dr David Warne for guidance using the high performance computing resource at QUT.

## References

- [1] Hirschhaeuser, F. *et al.* Multicellular tumor spheroids: An underestimated tool is catching up again. *Journal of Biotechnology* **148**, 3–15 (2010).
- [2] Costa, E. C. *et al.* 3D tumor spheroids: an overview on the tools and techniques used for their analysis. *Biotechnology Advances* **34**, 1427–1441 (2016).
- [3] Nath, S. & Devi, G. R. Three-dimensional culture systems in cancer research: Focus on tumor spheroid model. *Pharmacology & Therapeutics* **163**, 94–108 (2016).
- [4] Friedrich, J., Seidel, C., Ebner, R. & Kunz-Schughart, L. A. Spheroid-based drug screen considerations and practical approach. *Nature Protocols* **4**, 309–324 (2009).
- [5] Kunz-Schughart, L. A., Kreutz, M. & Knuechel, R. Multicellular spheroids: a three-dimensional *in vitro* culture system to study tumour biology. *International Journal of Experimental Pathology* **79**, 1–23 (1998).
- [6] Santini, M. . T. & Rainaldi, G. Three-dimensional spheroid model in tumor biology. *Pathobiology* **67**, 148–157 (1999).
- [7] Spoerri, L., Beaumont, K. A., Anfosso, A. & Haass, N. K. Real-time cell cycle imaging in a 3D cell culture model of melanoma. *Methods in Molecular Biology* **1612**, 401–416 (2017).
- [8] Smalley, K. S. M., Lioni, M., Noma, K., Haass, N. K. & Herlyn, M. *In vitro* three-dimensional tumour microenvironment models for anticancer drug discovery. *Expert Opinion on Drug Discovery* **3**, 1–10 (2008).
- [9] Mehta, G., Hsiao, A. Y., Ingram, M., Luker, G. D. & Takayama, S. Opportunities and challenges for use of tumor spheroids as models to test drug delivery and efficacy. *Journal of Controlled Release* **10**, 192–204 (2012).
- [10] Weiswald, L., Bellet, D. & Dangles-Marie, V. Spherical cancer models in tumor biology. *Neoplasia* **17**, 1–15 (2015).
- [11] Guillaume, L. *et al.* Characterization of the physical properties of tumor-derived spheroids reveals critical insights for pre-clinical studies. *Scientific Reports* **9**, 6597 (2019).
- [12] Lagies, S. *et al.* Cells grown in three-dimensional spheroids mirror *in vivo* metabolic response of epithelial cells. *Communications Biology* **3**, 246 (2020).
- [13] Albanese, A., Lam, A. K., Sykes, E. A., Rocheleau, J. V. & Chan, W. C. W. Tumour-on-a-chip provides an optical window into nanoparticle tissue transport. *Nature Communications* **4**, 2718 (2013).

- [14] Paczkowski, M. *et al.* Reciprocal interactions between tumour cell populations enhance growth and reduce radiation sensitivity in prostate cancer. *Communications Biology* **4**, 6 (2021).
- [15] Bacevic, K. *et al.* Spatial competition constrains resistance to targeted cancer therapy. *Nature Communications* **8**, 1995 (2017).
- [16] Muthusamy, T. *et al.* Serine restriction alters sphingolipid diversity to constrain tumour growth. *Nature* **586**, 790–795 (2020).
- [17] Dolega, M. E. *et al.* Cell-like pressure sensors reveal increase of mechanical stress towards the core of multicellular spheroids under compression. *Nature Communications* **8**, 14056 (2016).
- [18] Han, K. *et al.* CRISPR screens in cancer spheroids identify 3D growth-specific vulnerabilities. *Nature* **580**, 136–141 (2020).
- [19] Norton, L., Simon, R., Brereton, H. D. & Bogden, A. E. Predicting the course of Gompertzian growth. *Nature* **264**, 542–545 (1976).
- [20] Benzekry, S. *et al.* Classical mathematical models for description and prediction of experimental tumor growth. *PLOS Computational Biology* **10**, e1003800 (2014).
- [21] Greenspan, H. P. Models for the growth of a solid tumor by diffusion. *Studies in Applied Mathematics* **51**, 317–340 (1972).
- [22] Adam, J. A. & Maggelakis, S. A. Diffusion regulated growth characteristics of a spherical prevascular carcinoma. *Bulletin of Mathematical Biology* **52**, 549–582 (1990).
- [23] Jagiella, N., Müller, B., Müller, M., Vignon-Clementel, I. E. & Drasdo, D. Inferring growth control mechanisms in growing multi-cellular spheroids of NSCLC cells from spatial-temporal image data. *PLOS Computational Biology* **12**, e1004412 (2016).
- [24] Ward, J. P. & King, J. R. Mathematical modelling of avascular-tumour growth. *IMA Journal of Mathematics Applied in Medicine and Biology* **14**, 39–69 (1997).
- [25] Ward, J. P. & King, J. R. Mathematical modelling of avascular-tumour growth II: modelling growth saturation. *IMA Journal of Mathematics Applied in Medicine and Biology* **16**, 171–211 (1999).
- [26] Jiang, Y., Pjesivac-Grbovic, J., Cantrell, C. & Freyer, J. P. A multiscale model for avascular tumor growth. *Biophysical Journal* **89**, 3884–3894 (2005).
- [27] Jin, W., Spoerri, L., Haass, N. K. & Simpson, M. J. Mathematical model of tumour spheroid experiments with real-time cell cycle imaging. *Bulletin of Mathematical Biology* **83**, 44 (2021).
- [28] Armstrong, N. J., Painter, K. J. & Sherratt, J. A. A continuum approach to modelling cell-cell adhesion. *Journal of Theoretical Biology* **243**, 98–113 (2006).

- [29] Araujo, R. P. & McElwain, D. L. S. A history of the study of solid tumour growth: the contribution of mathematical modelling. *Bulletin of Mathematical Biology* **66**, 1039 (2004).
- [30] Bull, J. A., Mech, F., Quasier, T., Waters, S. L. & Byrne, H. M. Mathematical modelling reveals cellular dynamics within tumour spheroids. *PLoS Computational Biology* **16**, e1007961 (2020).
- [31] Kiran, K. L., Jayachandran, D. & Lakshminarayanan, S. Mathematical modelling of avascular tumour growth based on diffusion of nutrients and its validation. *The Canadian Journal of Chemical Engineering* **87**, 732–740 (2009).
- [32] Casciari, J. J., Sotirchos, S. V. & Sutherland, R. M. Mathematical modelling of microenvironment and growth in EMT6/Ro multicellular tumour spheroids. *Cell Proliferation* **25**, 1–22 (1992).
- [33] Gyllenberg, M. & Webb, G. F. Quiescence as an explanation of Gompertzian tumour growth. *Growth, Development, and Aging: GDA* **53**, 25–33 (1989).
- [34] McElwain, D. L. S. & Morris, L. E. Apoptosis as a volume loss mechanism in mathematical models of solid tumor growth. *Mathematical Biosciences* **39**, 147–157 (1977).
- [35] McElwain, D. L. S., Callcott, R. & Morris, L. E. A model of vascular compression in solid tumours. *Journal of Theoretical Biology* **78**, 405–415 (1979).
- [36] Michel, T. *et al.* Mathematical modeling of the proliferation gradient in multicellular tumor spheroids. *Journal of Theoretical Biology* **458**, 133–147 (2018).
- [37] Landman, K. A. & Please, C. P. Tumour dynamics and necrosis: surface tension and stability. *IMA Journal of Mathematics Applied in Medicine and Biology* **18**, 131–158 (2001).
- [38] Flegg, J. A. & Nataraj, N. Mathematical modelling and avascular tumour growth. *Resonance* **24**, 313–325 (2019).
- [39] Loessner, D., Flegg, J. A., Byrne, H. M., Clements, J. A. & Huttmacher, D. W. Growth of confined cancer spheroids: a combined experimental and mathematical modelling approach. *Integrative Biology* **5**, 597–605 (2013).
- [40] Byrne, H. M. Dissecting cancer through mathematics: from the cell to the animal model. *Nature Reviews Cancer* **10**, 221–230 (2010).
- [41] Roose, T., Chapman, S. J. & Maini, P. K. Mathematical models of avascular tumor growth. *SIAM Review* **49**, 179–208 (2007).
- [42] Sakaue-Sawano, A. *et al.* Visualizing spatiotemporal dynamics of multicellular cell-cycle progression. *Cell* **132**, 487–498 (2008).

- [43] Haass, N. K. *et al.* Real-time cell cycle imaging during melanoma growth, invasion, and drug response. *Pigment Cell & Melanoma Research* **27**, 764–776 (2014).
- [44] Vittadello, S. T., McCue, S. W., Gunasingh, G., Haass, N. K. & Simpson, M. J. Mathematical models for cell migration with real-time cell cycle dynamics. *Biophysical Journal* **114**, 1241–1253 (2018).
- [45] Vittadello, S. T., McCue, S. W., Gunasingh, G., Haass, N. K. & Simpson, M. J. Mathematical models incorporating a multi-stage cell cycle replicate normally-hidden inherent synchronisation in cell proliferation. *Journal of the Royal Society Interface* **16**, 20190382 (2019).
- [46] Carr, M. J., Simpson, M. J. & Drovandi, C. Estimating parameters of a stochastic cell invasion model with fluorescent cell cycle labelling using approximate Bayesian computation. *To appear, Journal of the Royal Society Interface* (2021).
- [47] Yano, S., Tazawa, H., Kagawa, S., Fujiwara, T. & Hoffman, R. M. FUCCI real-time cell-cycle imaging as a guide for designing improved cancer therapy: A review of innovative strategies to target quiescent chemo-resistant cancer cells. *Cancers* **12**, 2655 (2020).
- [48] Hoek, K. S. *et al.* Metastatic potential of melanomas defined by specific gene expression profiles with no BRAF signature. *Pigment Cell Research* **19**, 290–302 (2006).
- [49] Smalley, K. S. M. *et al.* An organometallic protein kinase inhibitor pharmacologically activates p53 and induces apoptosis in human melanoma cells. *Cancer Research* **67**, 209–217 (2007).
- [50] Smalley, K. S. M. *et al.* Ki67 expression levels are a better marker of reduced melanoma growth following MEK inhibitor treatment than phospho-ERK levels. *British Journal of Cancer* **96**, 445–449 (2007).
- [51] Spoerri, L. *et al.* Phenotypic melanoma heterogeneity is regulated through cell-matrix interaction-dependent changes in tumor microarchitecture. *Preprint on bioRxiv* (2021).
- [52] Spoerri, L., Gunasingh, G. & Haass, N. K. Fluorescence-based quantitative and spatial analysis of tumour spheroids: a proposed tool to predict patient-specific therapy response. *Frontiers in Digital Health* **3**, 668390 (2021).
- [53] Lucas, K. M. *et al.* Modulation of NOXA and MCL-1 as a strategy for sensitizing melanoma cells to the BH3-Mimnetic ABT-737. *Clinical Cancer Research* **18**, 783–795 (2012).
- [54] Takahashi, K. *et al.* Visualization of the cancer cell cycle by tissue-clearing technology using the Fucci reporter system. *Cancer Science* **0**, 1–14 (2021).
- [55] Yano, S. *et al.* Invading cancer cells are predominantly in G0/G1 resulting in chemoresistance demonstrated by real-time FUCCI imaging. *Cell Cycle* **13**, 953–960 (2014).



- [56] Zielke, N. & Edgar, B. A. FUCCI sensors: powerful new tools for analysis of cell proliferation. *WIREs Developmental Biology* **4**, 469–487 (2015).
- [57] Tuveson, D. & Clevers, H. Cancer modeling meets human organoid technology. *Science* **364**, 952–955 (2019).
- [58] Simpson, M. J., Baker, R. E., Vittadello, S. T. & Maclaren, O. J. Practical parameter identifiability for spatio-temporal models of cell invasion. *Journal of the Royal Society Interface* **17**, 2020055 (2020).
- [59] Simpson, M. J. *et al.* Profile likelihood analysis for a stochastic model of diffusion in heterogeneous media. *Proceedings of the Royal Society A: Mathematical, Physical and Engineering Sciences* **477**, 20210214 (2021).
- [60] Pawitan, Y. *In all likelihood: statistical modelling and inference using likelihood* (Oxford University Press, Oxford, UK, 2001).
- [61] Wieland, F., Hauber, A. L., Rosenblatt, M., Tonsing, C. & Timmer, J. On structural and practical identifiability. *Current Opinion in Systems Biology* **25**, 60–69 (2021).
- [62] Raue, A. *et al.* Structural and practical identifiability analysis of partially observed dynamical models by exploiting the profile likelihood. *Bioinformatics* **25**, 1923–1929 (2009).
- [63] Hines, K. E., Middendorf, T. R. & Aldrich, R. W. Determination of parameter identifiability in nonlinear biophysical models: a Bayesian approach. *The Journal of General Physiology* **143**, 401–416 (2014).
- [64] Warne, D. J., Baker, R. E. & Simpson, M. J. Using experimental data and information criteria to guide model selection for reaction–diffusion problems in mathematical biology. *Bulletin of Mathematical Biology* **81**, 1760–1804 (2019).
- [65] Browning, A. P., Haridas, P. & Simpson, M. J. A Bayesian sequential learning framework to parameterise continuum models of melanoma invasion into human skin. *Bulletin of Mathematical Biology* **81**, 676–698 (2019).
- [66] Kienzle, A. *et al.* Dendritic mesoporous silica nanoparticles for pH-stimuli-responsive drug delivery of TNF- $\alpha$ . *Advanced Healthcare Materials* **6**, 1700012 (2017).
- [67] Costa, E. C., Silva, D. B., Moreira, A. F. & Correia, I. J. Optical clearing methods: an overview of the techniques used for the imaging of 3D spheroids. *Biotechnology & Bioengineering* **116**, 2742–2763 (2019).
- [68] Susaki, E. A. *et al.* Versatile whole-organ/body staining and imaging based on electrolyte-gel properties of biological tissues. *Nature Communications* **11**, 1982 (2020).

- [69] Browning, A. P. & Murphy, R. J. Image processing algorithm to identify structure of tumour spheroids with cell cycle labelling. *Zenodo* (2021).
